# Supplementary material for: Rationally designed hierarchical nickel nanoparticles-based magnetic yolk-like nanospindles for enhanced catalysis and protein adsorption
Source: Royal Society of Chemistry journal article supplement (doi:10.1039/c8ce00944a), 2018-01-01
Supplement: c8ce00944a1.pdf [file c8ce00944a1.pdf]

## Rationally Designed Hierarchical nickel-enabled magnetic yolk-like nanospindles for enhanced catalysis and protein adsorption

Qiong Wen<sup>a</sup>, Min Zhang<sup>a\*</sup>, Jing Zheng<sup>a</sup>, Jingli Xu<sup>a\*</sup>

<sup>a</sup>College of Chemistry and Chemical Engineering, Shanghai University of Engineering Science, Shanghai 201620, PR China Email: zhangmin@sues.edu.cn; xujingli@sues.edu.cn

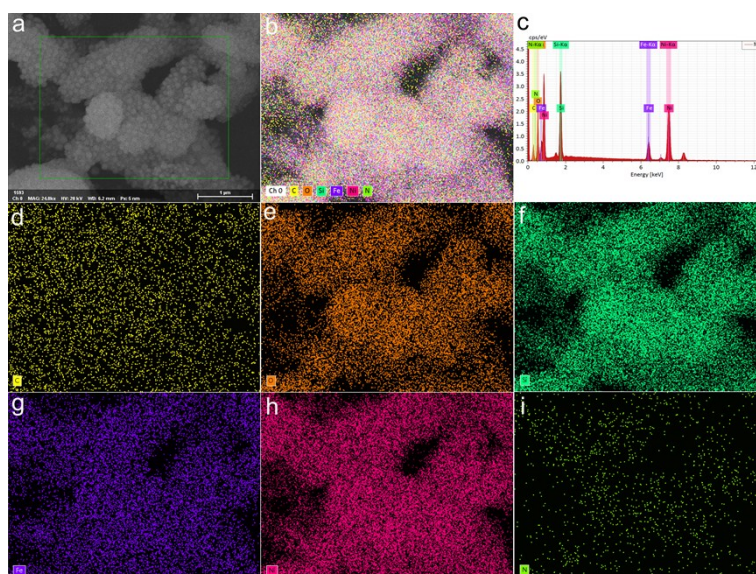

**Fig. S1** Energy-disperse X-ray spectrum (EDS) mapping imagines and EDX spectrum of FeOx@SiO<sub>2</sub>@C-Ni/900(c). (d) C, (e) O, (f) Si, (g) Fe, (h) Ni, (i) N

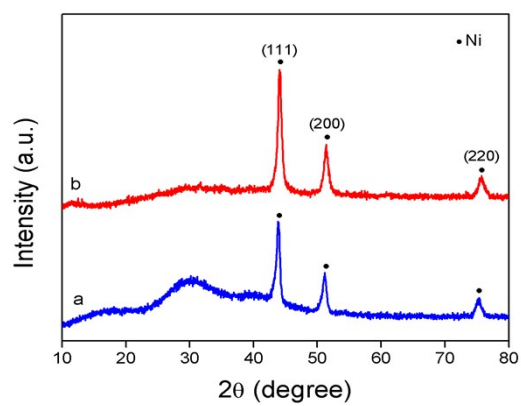

**Fig. S2** The XRD Pattern of  $\text{Fe}_2\text{O}_3@NS@PDA$  calcinated in nitrogen environment at 700 °C (a), and 900 °C (b).

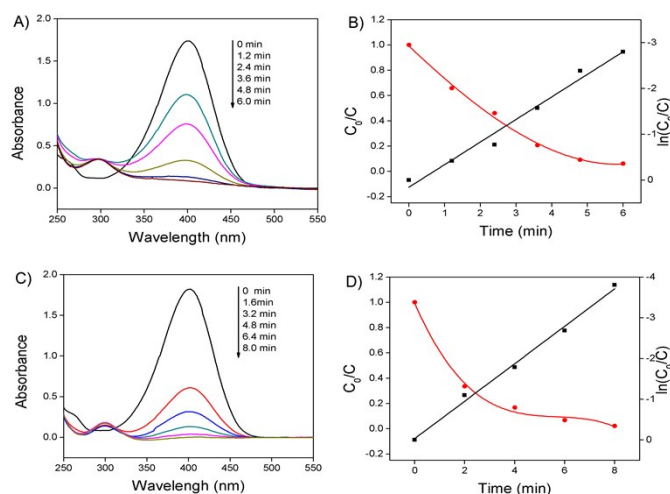

**Fig. S3** (A) successive reduction of 4-NP using  $\text{FeO}_x@\text{SiO}_2@\text{C-Ni}/700$  as catalysts; (B)  $C/C_0$  and  $\ln(C/C_0)$  versus time for the reduction of 4-NP over 1 mg  $\text{FeO}_x@\text{SiO}_2@\text{C-Ni}/700$  catalysts; (C) successive reduction of 4-NP using  $\text{FeO}_x@\text{SiO}_2@\text{C-Ni}/900$  as catalysts; (D)  $C/C_0$  and  $\ln(C/C_0)$  versus time for the reduction of 4-NP over 1 mg  $\text{FeO}_x@\text{SiO}_2@\text{C-Ni}/900$  catalysts.

**Table S1.** The ICP data of the resultant products with different calcination temperature before and after catalytic reaction.

| Catalysts                                   | Ni ( $\mu\text{g}\cdot\text{mg}^{-1}$ ) |
|---------------------------------------------|-----------------------------------------|
| $\text{FeO}_x@\text{SiO}_2@\text{C-Ni}/500$ | 256.67                                  |
| $\text{SiO}_2@\text{C-Ni}/700$              | 394.69                                  |
| $\text{SiO}_2@\text{C-Ni}/900$              | 474.32                                  |

**Table S2.** A full comparison of  $\text{FeO}_x@\text{SiO}_2@\text{C-Ni}$  nanospindles catalysis activity and test condition with other nickel and noble metal catalysts.

| Catalyst                                                     | Type           | $K(\times 10^{-3}\text{s}^{-1})$ | $\kappa(\text{g}^{-1}\text{s}^{-1})$ | Ref.      |
|--------------------------------------------------------------|----------------|----------------------------------|--------------------------------------|-----------|
| $\text{FeO}_x@\text{SiO}_2@\text{C-Ni}/500$                  | nanospindles   | 46                               | 179.22                               | This work |
| $\text{SiO}_2@\text{C-Ni}/700$                               | nanospindles   | 8.21                             | 20.85                                | This work |
| $\text{SiO}_2@\text{C-Ni}/900$                               | nanospindles   | 7.66                             | 16.15                                | This work |
| Au nanoparticles                                             | nanoparticles  | 0.06                             | 0.72                                 | S1        |
| Pd nanocatalysts                                             | nanoparticles  | 0.73                             | 0.36                                 | S2        |
| $\text{Fe}_3\text{O}_4@\text{SiO}_2\text{-Au}@m\text{SiO}_2$ | Core-shell     | 7.0                              | 105                                  | S3        |
| $\text{Au}@m\text{eso-SiO}_2$                                | Hollow spheres | 0.08                             | 2.51                                 | S4        |
| $\text{Ni}/\text{SiO}_2$                                     | Core-shell     | 2.8                              | 0.94                                 | S5        |
| $\text{Cu}_2\text{O}@Ag$                                     | Core-shell     | 0.44                             | 1.09                                 | S6        |

|                                                      |               |      |      |     |
|------------------------------------------------------|---------------|------|------|-----|
| RGO-Ni                                               | Nanosheets    | 0.25 | 0.04 | S7  |
| C-Ni/600                                             | Nanoparticles | 18.6 | 449  | S8  |
| Ni/SNTs                                              | Nanotube      | 84   | 91   | S9  |
| Fe <sub>3</sub> O <sub>4</sub> @SiO <sub>2</sub> -Ag | nanospheres   | 7.67 | 7.67 | S10 |
| Ni (modified)                                        | Nanoparticles | 2.4  | 0.80 | S11 |
| Ni/MC-550                                            | Bottle-neck   | 1.51 | 338  | S12 |

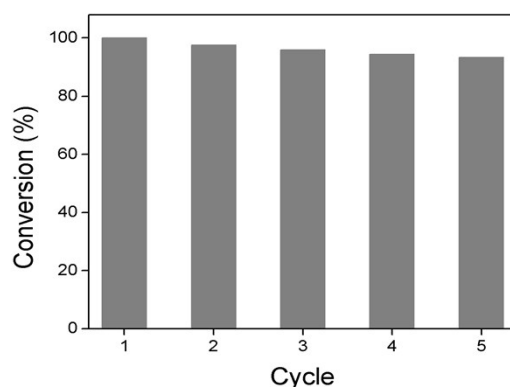

**Fig. S4** The reusability of FeO<sub>x</sub>@SiO<sub>2</sub>@C-Ni/500 as the catalyst for the reduction of 4-NP with NaBH<sub>4</sub>.

**Table S3.** Properties of different adsorbents for His-rich proteins capture.

| Adsorbent                                                                   | Type          | Capacity (mg g <sup>-1</sup> ) | Ref.      |
|-----------------------------------------------------------------------------|---------------|--------------------------------|-----------|
| FeO <sub>x</sub> @SiO <sub>2</sub> @C-Ni/500                                | nanospindles  | 1893.0                         | This work |
| FeO <sub>x</sub> @SiO <sub>2</sub> @C-Ni/700                                | nanospindles  | 952.4                          | This work |
| FeO <sub>x</sub> @SiO <sub>2</sub> @C-Ni/900                                | nanospindles  | 724.6                          | This work |
| CNTs/Fe <sub>3</sub> O <sub>4</sub> @Cu Silicate                            | nanotubes     | 302.3                          | S13       |
| Cu-IDA-silica-coated Fe <sub>3</sub> O <sub>4</sub>                         | microspheres  | 418.6                          | S14       |
| Magnetic HCNTs                                                              | nanotubes     | 2200                           | S15       |
| Fe <sub>3</sub> O <sub>4</sub> @PVBC@IDA-Ni                                 | core-shell    | 1988                           | S16       |
| Fe <sub>3</sub> O <sub>4</sub> /Cys                                         | nanospheres   | 53.2                           | S17       |
| Fe <sub>3</sub> O <sub>4</sub> @SiO <sub>2</sub> @LDH                       | Microspheres  | 239                            | S18       |
| MnFe <sub>2</sub> O <sub>4</sub> @SiO <sub>2</sub> @NH <sub>2</sub> @2AB-Ni | nanoparticles | 220                            | S19       |
| Fe <sub>3</sub> O <sub>4</sub> @NiSiO <sub>3</sub>                          | Yolk-shell    | 220                            | S20       |
| Fe <sub>3</sub> O <sub>4</sub> @SiO <sub>2</sub> -IDA-Cu                    | nanoparticles | 38.2                           | S21       |
| P(PEGDMA-VI)@ECA                                                            | microspheres  | 22.0                           | S22       |
| Fe <sub>3</sub> O <sub>4</sub> @SiO <sub>2</sub> @C/Ni                      | nanoparticles | 409.8                          | S23       |

|                                                |              |      |     |
|------------------------------------------------|--------------|------|-----|
| $\text{Fe}_3\text{O}_4@\text{SiO}_2@\text{IL}$ | microspheres | 2150 | S24 |
|------------------------------------------------|--------------|------|-----|

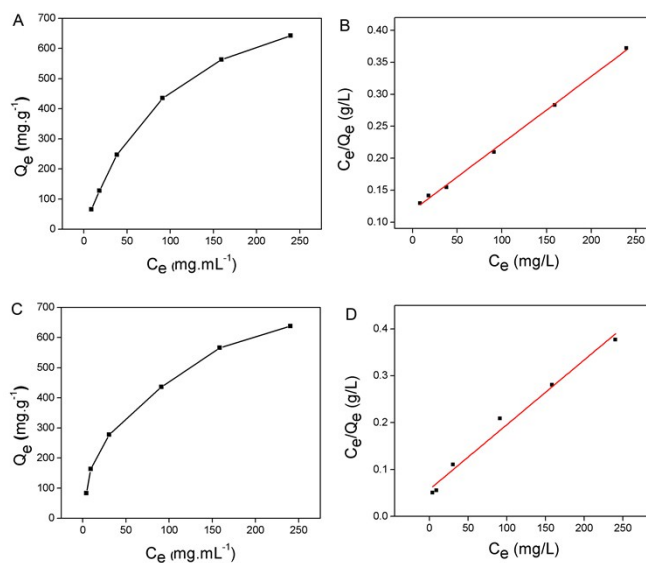

**Fig. S5** Adsorption isotherms of protein BHB and Linear fitting of adsorption isotherms plots based on Langmuir model for  $\text{FeO}_x@\text{SiO}_2@\text{C-Ni}/700$  (A,B),  $\text{FeO}_x@\text{SiO}_2@\text{C-Ni}/900$  (C,D).

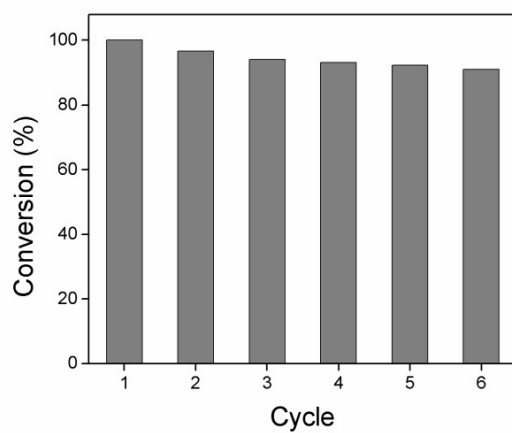

**Fig. S6** The reusability of  $\text{FeO}_x@\text{SiO}_2@\text{C-Ni}/500$ .

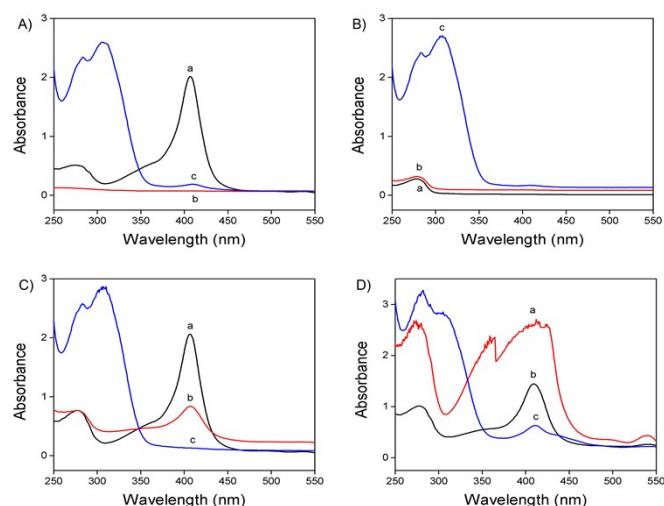

**Fig. S7** Curve a is UV-vis spectra of 0.4 mg mL<sup>-1</sup> of the BHb (A), BSA (B), BHb and BSA mixture (C), and 500-fold diluted bovine blood (D) before adsorbed by FeO<sub>x</sub>@SiO<sub>2</sub>@C-Ni/500 adsorbents. Curve b is the UV-vis spectra of the supernatant of the above BHb (A), BSA (B), BHb and BSA mixture (C), and 100-fold diluted bovine blood (D) after adsorption by adsorbents. Curve c is the UV-vis spectra of desorption solution of the adsorbed protein by adsorbents in BHb (A), BSA (B), BHb and BSA mixture (C) and 100-fold diluted bovine blood (D) using a concentration of 0.2 g mL<sup>-1</sup> of imidazole solution as the eluent.

## Notes and references

- S1. K. B. Narayanan and N. Sakthivel, *J. Hazard. Mater.*, 2011, **189**, 519-525.
- S2. X. Lu, X. Bian, G. Nie, C. Zhang, C. Wang and Y. Wei, *J. Mater. Chem.*, 2012, **22**, 12723-12730.
- S3. Y. H. Deng, Y. Cai, Z. K. Sun, J. Liu, C. Liu, J. Wei, W. Li, C. Liu, Y. Wang and D. Y. Zhao, *J. Am. Chem. Soc.*, 2010, **132**, 8466.
- S4. J. Chen, Z. Xue, S. Feng, B. Tu and D. Zhao, *J. Colloid Interface Sci.*, 2014, **429**, 62-67.
- S5. Z. Jiang, J. Xie, D. Jiang, J. Jing and H. Qin, *Cryst Eng Comm.*, 2012, **14**, 4601.
- S6. S. Kandula and P. Jeevanandam, *Eur. J. Inorg. Chem.*, 2016, **10**, 1548-1557.
- S7. Z. Ji, X. Shen, G. Zhu, H. Zhou and A. Yuan, *J. Mater. Chem.*, 2012, **22**, 3471-3477.
- S8. L. Ding, M. Zhang, Y. W. Zhang, J. B. Yang, J. Zheng, Tasawar Hayat, Njud S. Alharbi and J. L. Xu, *nanotechnology.*, 2017, **34**, 345601-345610.
- S9. Y. Chi, Q. Yuan, Y. J. Li, J. C. Tu, L. Zhao, N. Li, X. T. Li, *J. Colloid Interface Sci.*, 2012, **383**, 96-102.
- S11. Jiang Z, Xie J, Jiang D, Wei X and Chen M, *Cryst Eng Comm.*, 2013, **15**, 560-569.

- S12. Y. Yang, Y. Ren, C. Sun and S. Hao, *Chem. Soc. Rev.*, 2014, **41**, 5577-5578.
- S13. M. Zhang, Y. Wang, Y. Zhang, L. Ding, J. Zheng and J. L. Xu, *Appl. Surf. Sci.*, 2016, **375**, 154-161.
- S14. M. Zhang, D. Cheng, X. W. He, L. X. Chen and Y. K. Zhang, *Chem. Asian J.*, 2010, **5**, 1332-1340.
- S15. M. Zhang, B. Wang, Y. Zhang, W. Li, W. Gan and J. Xu, *Dalton Trans.*, 2016, **45**, 922-927.
- S16. J. L. Cao, X. H. Zhang, X. W. He, L. X. Chen, Y. K. Zhang, *J. Mater. Chem. B*, 2013, **1**, 3625-3632.
- S17. X. Y. Zou, K. Li, Y. B. Zhao, Y. Zhang, B. J. Li and C. P. Song, *J. Mater. Chem. B*, 2013, **1**, 5108-5113.
- S18. M. F. Shao, F. Y. Ning, J. W. Zhao, M. Wei, David G. Evans and X. Duan, *J. Am. Chem. Soc.*, 2012, **134**, 2,1071-1078.
- S19. Z. Rashid, H. Naeimi, A. H. Zarnani, M. Nazari, M. R. Nejadmoghaddam and R. Ghahremanzadeh, *RSC Adv.*, 2016, **6**, 36840-36848.
- S20. Y. Wang, G. C. Wang, Y. Xiao, Y. L. Yang and R. K. Tang, *ACS Appl. Mater. Inter.*, 2014, **6**, 19092-19099.
- S21. G. Q. Jian, Y. X. Liu, X. W. He, L. X. Chen and Y. K. Zhang, *Nanoscale*, 2012, **4**, 6336-6342.
- S22. C. B. Du, N. Zhang, S. C. Ding, X. M. Gao, P. Guan and X. L. Hu, *Polym. Chem.*, 2016, **7**, 1-3.
- S23. Y. W. Zhang, M. Zhang, J. B. Yang, L. Ding, J. Zheng, J. L. Xu, and S. L. Xiong, *Name.*, 2016, **8**, 15978-15988.
- S24. Y. Wei, Y. Li, A. Tian, Y. Fan, X. Wang, *J. Mater. Chem. B*, 2013, **1**, 2066-2071.
